# Supplementary material for: Theoretical insight into the intrinsic electronic transport properties of graphene–biphenylene–graphene nanosheets and nanoribbons: a first-principles study
Source: Royal Society of Chemistry journal article supplement (doi:10.1039/d3tc01189e), 2023-01-01
Supplement: d3tc01189e1.pdf [file d3tc01189e1.pdf]

**Theoretical insight into the intrinsic electronic transport properties of graphene/biphenylene/graphene nanosheet and nanoribbon: a first-principles study**

Cheng Luo<sup>a</sup>, Tong Chen<sup>\*ab</sup>, Xiansheng Dong<sup>a</sup>, Luzhen Xie<sup>a</sup>, Danfeng Qin<sup>a</sup>, Lin Huang<sup>a</sup>, Huili Li<sup>c</sup>, Xianbo Xiao<sup>\*c</sup>

a. Energy materials computing center, Jiangxi University of Science and Technology, Nanchang 330013, PR China

b State Key Laboratory of Surface Physics and Department of Physics, Fudan University, Shanghai 200433, PR China

c. School of Computer Science, Jiangxi University of Chinese Medicine, Nanchang 330004, PR China

E-mail addresses: chentong@jxust.edu.cn (T. Chen),  
20101034@jxutcm.edu.cn (X. Xiao).

## Supplementary material

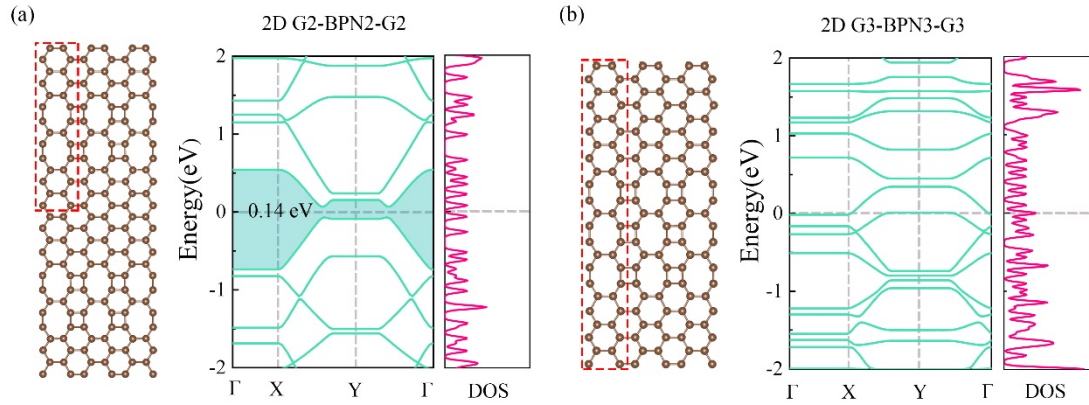

**Figure S1:** Top view, energy band and density of states of G2-BPN2-G2 (a) and G3-BPN3-G3 (b) heterostructure monolayer. The zero of the energy is set to  $E_f$  displayed by a level dotted line. Inside the red dotted rectangle delegates the structural unit of the heterojunction.

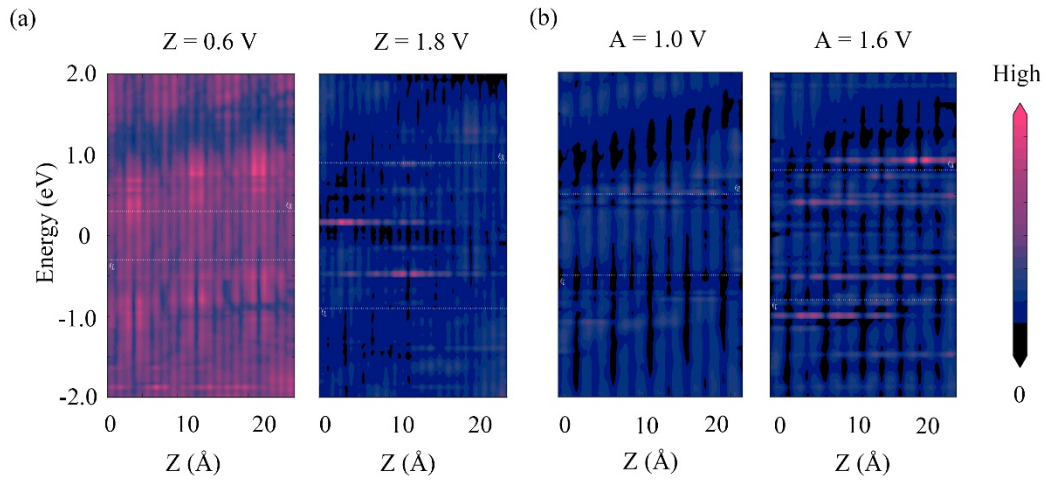

**Figure S2:** (a) PLDOS along the armchair direction at a bias of 1.0 V and 1.6 V. (b) PLDOS along the serrated direction at a bias of 0.6 V and 1.8 V. The color bar shows the data from 0 (black) to high (red).

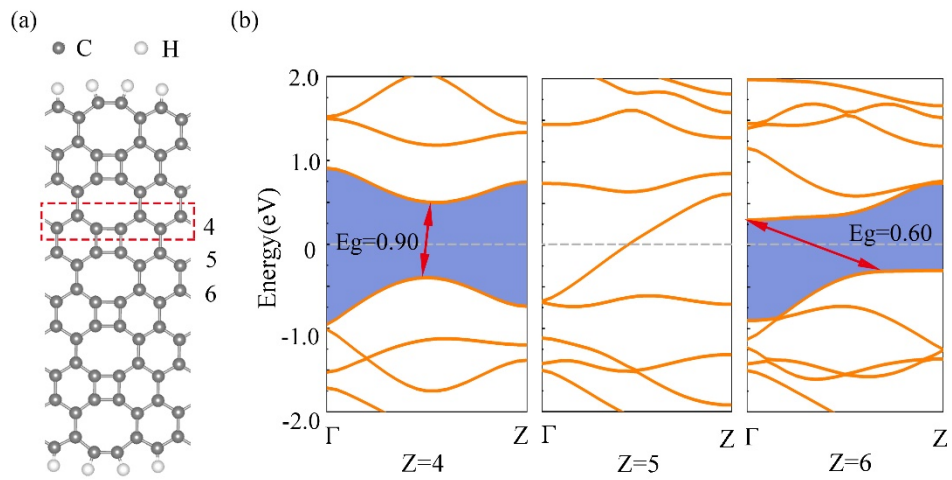

**Figure. S3** (a) Structures along the zigzag direction. The red rectangular dashed line indicates the changing unit structure of 4 to 6. (b) Energy bands of different structures from 4 to 6. The red arrow indicates the width of the band gap and the gray dashed line represents the Fermi energy level.

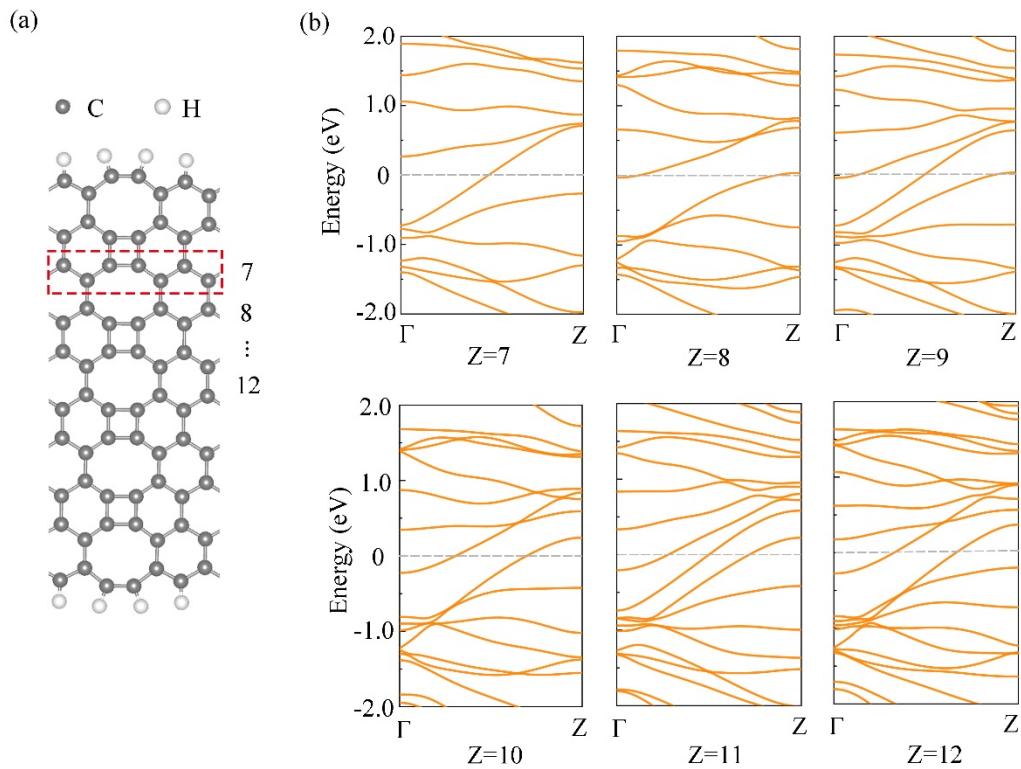

**Figure. S4** (a) Structures along the zigzag direction. The red rectangular dashed line indicates the changing unit structure of 7 to 12. (b) Energy bands of different structures from 7-12. The gray dashed line represents the Fermi energy level.

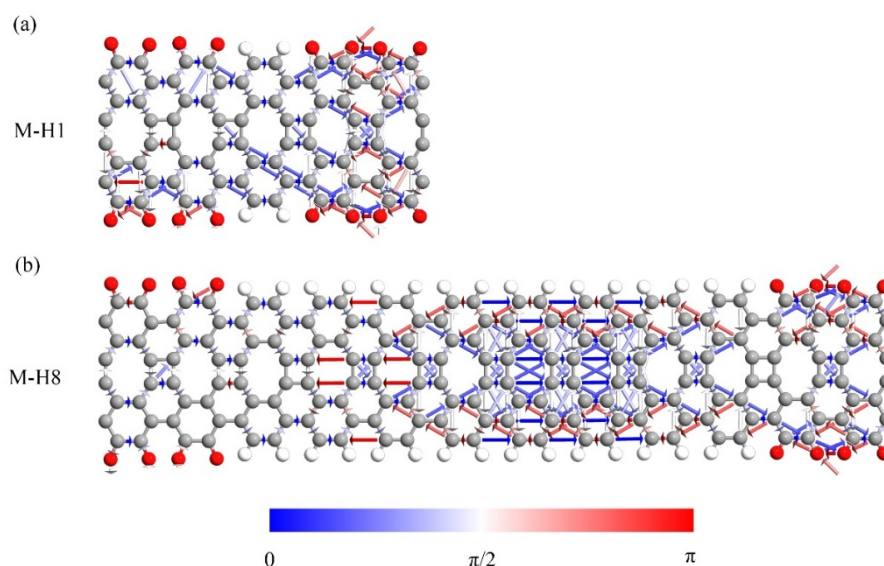

**Figure. S5:** Transmission pathway of G-BPN-G heterojunction devices M-H1 (a) and M-H8 (b). The bias voltage is set to 0.8 V. The color bar shows the data from 0 (blue) to  $\pi$  (red).

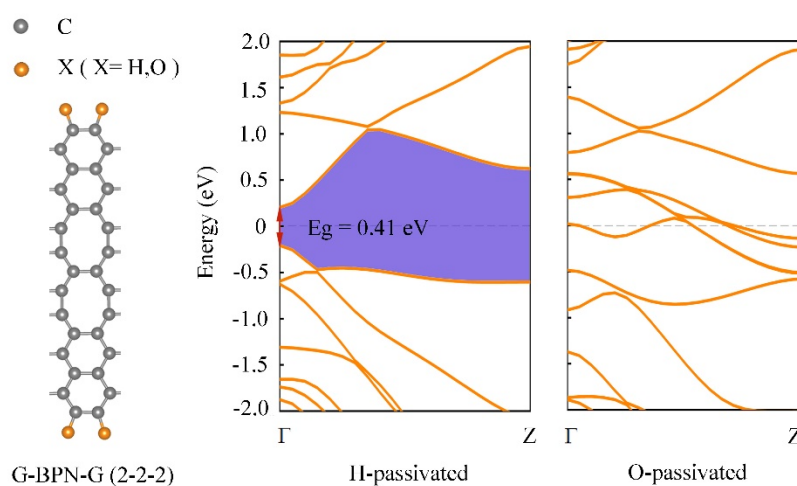

**Figure. S6:** H-passivated (a) and O-passivated (b) G-BPN-G (2-2-2) nanoribbon structures and energy bands.

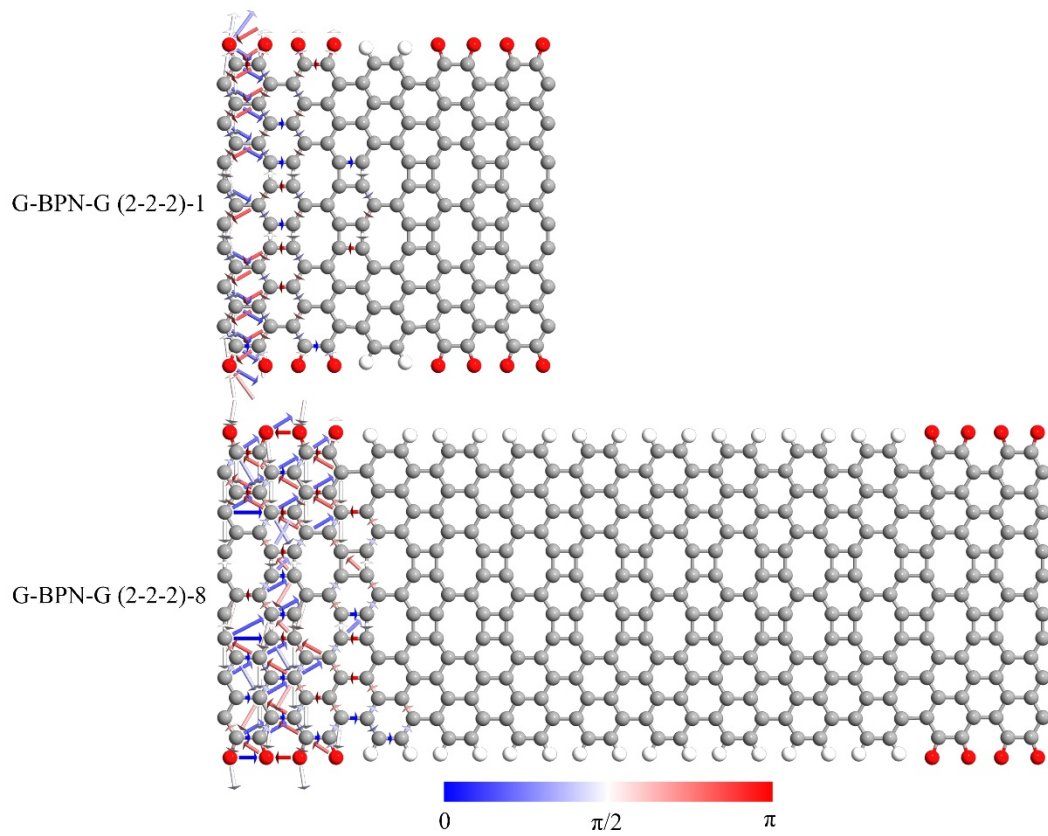

**Figure. S7:** Transport paths of G-BPN-G (2-2-2) nanoribbon O-passivated devices M-H1 (a) and M-H8 (b). The bias voltage is set to 0.8 V. The color bar shows the data from 0 (blue) to  $\pi$  (red).
